# Supplementary material
Source: publisher figshare collection journal article supplement (https://frontiersin.figshare.com/ndownloader/files/25569041)
Supplement: Supplementary file [file 25569041]

## **Supplementary Information**

### **Computational investigation of structural dynamics of SARS-CoV-2 methyltransferase-stimulatory factor heterodimer nsp16/nsp10 bound to the cofactor SAM**

Md Fulbabu Sk<sup>#</sup>, Nisha Amarnath Jonniya<sup>#</sup>, Rajarshi Roy, Sayan Poddar, Parimal Kar\*

Discipline of Biosciences and Biomedical Engineering, Indian Institute of Technology  
Indore, Khandwa Road, MP 453552, India

<sup>#</sup>Both authors contributed equally

\*Corresponding author: Parimal Kar| Email: [parimal@iiti.ac.in](mailto:parimal@iiti.ac.in) Phone: +91 731 2438700  
(Ext. 550)

**Table S1:** The average RMSD values of various regions and SAM for the complex and nsp16<sub>SAM</sub> systems. All values are in Å unit, and standard deviations are given in parentheses.

| Region/cofactor          | complex   | nsp16 <sub>SAM</sub> |
|--------------------------|-----------|----------------------|
| SAM                      | 0.7 (0.1) | 2.1 (0.8)            |
| Around 5Å of SAM         | 0.8 (0.1) | 2.2 (0.8)            |
| Loop 26-38 (last 400 ns) | 1.4 (0.5) | 3.1 (0.5)            |

**Table S2:** The hydrophobic network at the interface of nsp10 and nsp16 in the complex.

| Structure | Hydrophobic network nodes                                                                                                                                            |
|-----------|----------------------------------------------------------------------------------------------------------------------------------------------------------------------|
| 0 ns      | (V104, <b>A71</b> ), (V78, <b>V42</b> ), (P80, <b>V42</b> ), (A83, <b>V42</b> ), (A83, <b>M44</b> ),<br>(I40, <b>L45</b> ), (L244, <b>L45</b> ), (M247, <b>L45</b> ) |
| 100 ns    | (V104, <b>A71</b> ), (P80, <b>V42</b> ), (M247, <b>L45</b> )                                                                                                         |
| 200 ns    | (I40, <b>M44</b> ), (V104, <b>A71</b> )                                                                                                                              |
| 300 ns    | (V104, <b>A71</b> ), (P80, <b>V42</b> )                                                                                                                              |
| 400 ns    | (V104, <b>A71</b> ), (P80, <b>V42</b> )                                                                                                                              |
| 500 ns    | (V104, <b>A71</b> ), (P80, <b>V42</b> ), (I40, <b>M44</b> )                                                                                                          |

Bold letters residues belong to nsp10

**Table S3:** Binding free energy decomposition of key residues between nsp16 and nsp10 in complex in the unit of kcal/mol.

| Residue | $T_{vdW}$ | $T_{ele}$ | $T_{pol}$ | $T_{np}$ | $T_{back}$ | $T_{side}$ | $T_{total}$ |
|---------|-----------|-----------|-----------|----------|------------|------------|-------------|
| nsp16   |           |           |           |          |            |            |             |
| Ile40   | -3.21     | 0.07      | 0.11      | -0.44    | -0.22      | -3.25      | -3.47       |
| Val104  | -3.40     | 3.00      | -1.98     | -0.67    | 0.29       | -3.34      | -3.05       |
| Ala83   | -1.47     | -1.84     | 0.92      | -0.29    | -1.31      | -1.37      | -2.68       |
| Val78   | -2.66     | 1.61      | -1.05     | -0.44    | 0.09       | -2.63      | -2.54       |
| Met247  | -3.20     | -1.12     | 2.33      | -0.46    | 0.16       | -2.61      | -2.45       |
| Val44   | -1.87     | -0.03     | 0.18      | -0.27    | -0.05      | -1.94      | -1.99       |
| Gln87   | -3.22     | -4.41     | 6.54      | -0.66    | 0.37       | -2.12      | -1.75       |
| Arg86   | -2.37     | 48.08     | -47.12    | -0.33    | -0.60      | -1.14      | -1.74       |
| Lys76   | -1.58     | 27.69     | -27.02    | -0.43    | -0.34      | -1.00      | -1.34       |
| Lys38   | -0.43     | 3.01      | -3.60     | -0.27    | -0.93      | -0.36      | -1.29       |
| Val84   | -1.11     | 0.44      | -0.46     | -0.03    | -0.44      | -0.72      | -1.16       |
| Met41   | -1.25     | -0.13     | 0.50      | -0.20    | -0.02      | -1.06      | -1.08       |
| nsp10   |           |           |           |          |            |            |             |
| Leu45   | -5.75     | -2.51     | 2.98      | -1.22    | -0.83      | -5.67      | -6.50       |
| Ala71   | -2.49     | -5.31     | 4.97      | -0.42    | -1.21      | -2.04      | -3.25       |
| Val42   | -3.23     | 1.06      | -0.38     | -0.62    | 0.09       | -3.26      | -3.17       |
| Met44   | -3.86     | -1.24     | 2.50      | -0.39    | 0.16       | -3.15      | -2.99       |
| Tyr96   | -2.39     | -3.63     | 4.00      | -0.44    | 0.04       | -2.50      | -2.46       |
| Gly69   | -0.73     | -3.60     | 2.81      | -0.07    | -1.36      | -0.23      | -1.59       |
| Thr47   | -1.87     | 0.06      | 0.77      | -0.41    | -0.29      | -1.16      | -1.45       |
| Arg78   | -2.38     | -31.70    | 33.16     | -0.44    | 0.14       | -1.49      | -1.36       |
| Gly70   | -0.64     | -3.58     | 3.02      | -0.02    | -1.11      | -0.11      | -1.22       |
| Gly94   | -1.76     | -3.85     | 4.75      | -0.34    | -0.59      | -0.61      | -1.20       |
| Pro59   | -1.28     | -1.46     | 1.88      | -0.17    | -0.18      | -0.85      | -1.03       |

**Table S4:** Percentage atomic contacts between nsp16 and nsp10 in a complex from the MD simulations and set the cutoff distance is 3.90 Å.

| Contacts   |           | Molecular Dynamics (MD) |                   |
|------------|-----------|-------------------------|-------------------|
| nsp16      | nsp10     | Occupancy (%)           | Avg. Distance (Å) |
| Ala83@O    | Tyr96@OH  | 99.6                    | 2.8               |
| Gln87@N    | Tyr96@OH  | 99.2                    | 3.1               |
| Gln87@NE2  | Leu45@O   | 99.2                    | 2.9               |
| Arg86@CB   | Tyr96@OH  | 98.1                    | 3.4               |
| Arg86@C    | Tyr96@OH  | 98.0                    | 3.3               |
| Lys38@O    | Lys43@NZ  | 97.8                    | 2.8               |
| Gln87@CA   | Tyr96@OH  | 92.4                    | 3.5               |
| Ser105@C   | Ala71@CB  | 92.4                    | 3.4               |
| Lys38@O    | Lys43@CE  | 91.2                    | 3.6               |
| Arg86@CG   | Tyr96@OH  | 90.9                    | 3.5               |
| Gln87@CB   | Tyr96@OH  | 86.5                    | 3.6               |
| Ser105@O   | Ala71@CB  | 82.9                    | 3.5               |
| Ala81@O    | Met44@CE  | 82.7                    | 3.5               |
| Gln93@OE1  | Met44@CE  | 82.6                    | 3.4               |
| Ala83@C    | Met44@CE  | 75.2                    | 3.7               |
| Gln87@NE2  | Pro59@CG  | 75.1                    | 3.6               |
| Asp106@OD1 | Ala71@CB  | 71.5                    | 3.5               |
| Asp106@OD1 | Ala71@N   | 70.2                    | 3.1               |
| Gln87@CD   | Leu45@O   | 64.0                    | 3.7               |
| Asp106@OD1 | Gly70@N   | 62.9                    | 3.4               |
| Asp106@O   | Gly94@CA  | 59.9                    | 3.5               |
| Gln87@CD   | Pro59@CG  | 59.4                    | 3.7               |
| Asp106@CG  | Ala71@CB  | 59.1                    | 3.7               |
| Arg86@CA   | Tyr96@OH  | 56.9                    | 3.8               |
| Thr48@OG1  | Leu45@CD1 | 56.3                    | 3.6               |
| Gln87@OE1  | Leu45@O   | 53.2                    | 3.7               |
| Asp106@OD2 | Ala71@CB  | 50.6                    | 3.6               |

Only contacts with more than 50% occupancy are listed.

**Table S5:** Energetics components of binding free energy between nsp16 and nsp10 in the presence of cofactor SAM in a complex.

| Complex at    | $\Delta E_{vdW}$ | $\Delta E_{elec}$ | $\Delta G_{pol}$ | $\Delta G_{np}$ | $\Delta G_{bind}$ |
|---------------|------------------|-------------------|------------------|-----------------|-------------------|
| 300 K         | -90.4 (0.2)      | -429.4 (3.0)      | 481.7 (3.2)      | -9.6 (0.0)      | -47.7 (0.4)       |
| 310 K         | -91.9 (0.2)      | -279.3 (1.5)      | 328.9 (1.5)      | -9.9 (0.0)      | -52.2 (0.3)       |
| 0.15 M, 300 K | -89.6 (0.1)      | -247.5 (1.2)      | 301.6 (1.2)      | -9.3 (0.0)      | -44.8 (0.2)       |
| 0.25 M, 300 K | -83.8 (0.2)      | -212.3 (1.3)      | 267.6 (1.4)      | -9.2 (0.0)      | -37.7 (0.2)       |

**Table S6:** Energy components of the binding free energy between the cofactor SAM and nsp16 in the presence of nsp10 in a complex.

| Complex at    | $\Delta E_{vdW}$ | $\Delta E_{elec}$ | $\Delta G_{pol}$ | $\Delta G_{np}$ | $\Delta G_{bind}$ |
|---------------|------------------|-------------------|------------------|-----------------|-------------------|
| 300 K         | -40.4 (0.1)      | -181.1 (0.5)      | 179.0 (0.4)      | -4.1 (0.0)      | -46.6 (0.2)       |
| 310 K         | -21.0 (0.1)      | -44.1 (0.8)       | 54.5 (0.7)       | -2.5 (0.0)      | -13.2 (0.2)       |
| 0.15 M, 300 K | -29.0 (0.1)      | -69.9 (0.5)       | 78.7 (0.4)       | -3.5 (0.0)      | -23.7 (0.1)       |
| 0.25 M, 300 K | -29.0 (0.1)      | -68.5 (0.5)       | 78.9 (0.5)       | -3.5 (0.0)      | -22.1 (0.1)       |

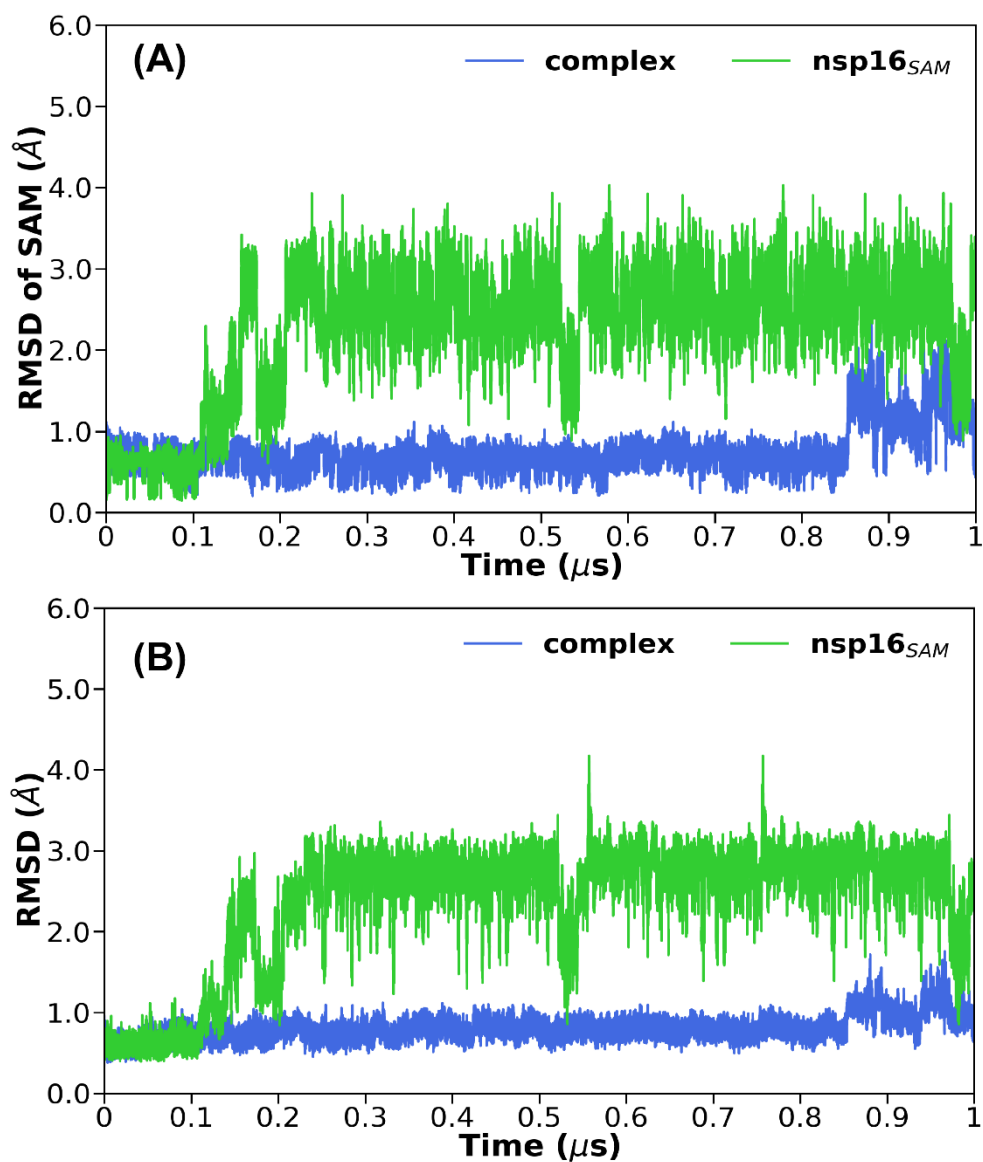

**Figure S1:** The time evolution of root-mean-square deviations (RMSDs) of (A) heavy atoms of SAM and (B) binding pocket (5 Å radius of SAM) of the complex and nsp16<sub>SAM</sub> systems.



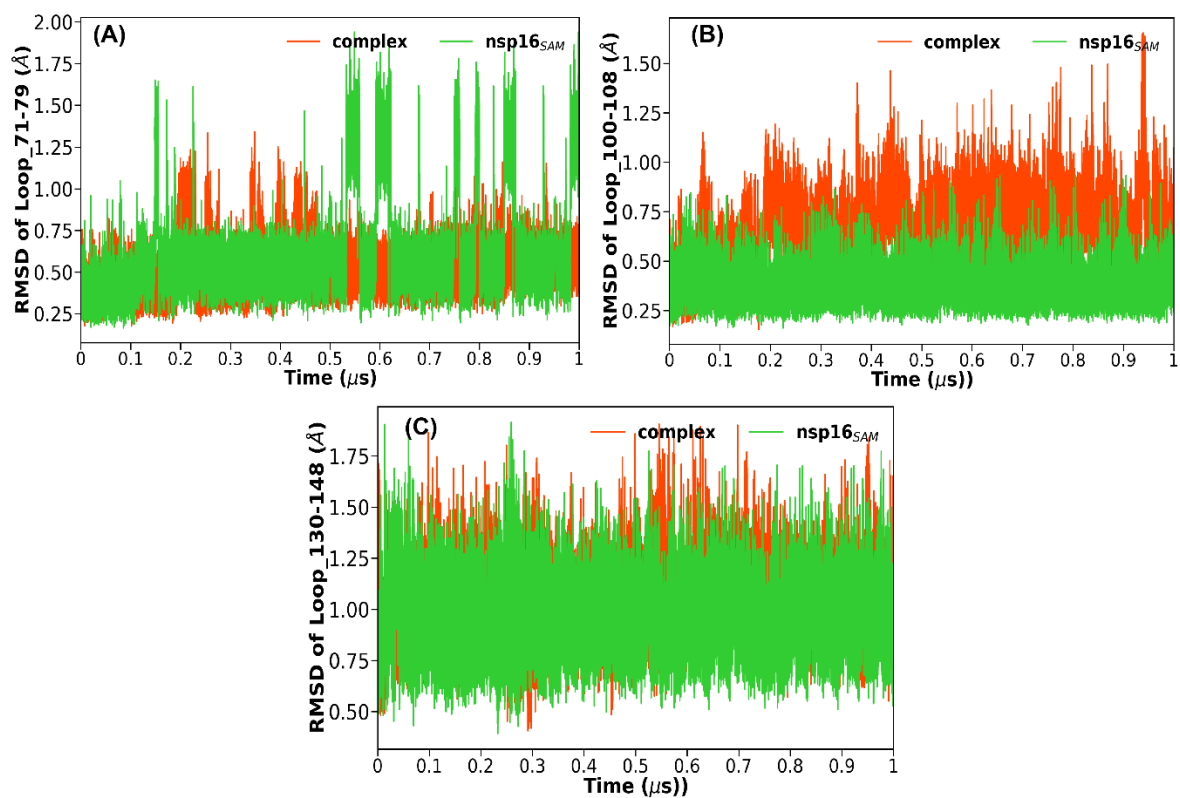

**Figure S2:** The temporal RMSDs of backbone atoms of (A) loop 71-79, (B) loop 100-108, and (C) loop 130-148 in the complex (orange-red) and nsp16<sub>SAM</sub> (lime-green) form.

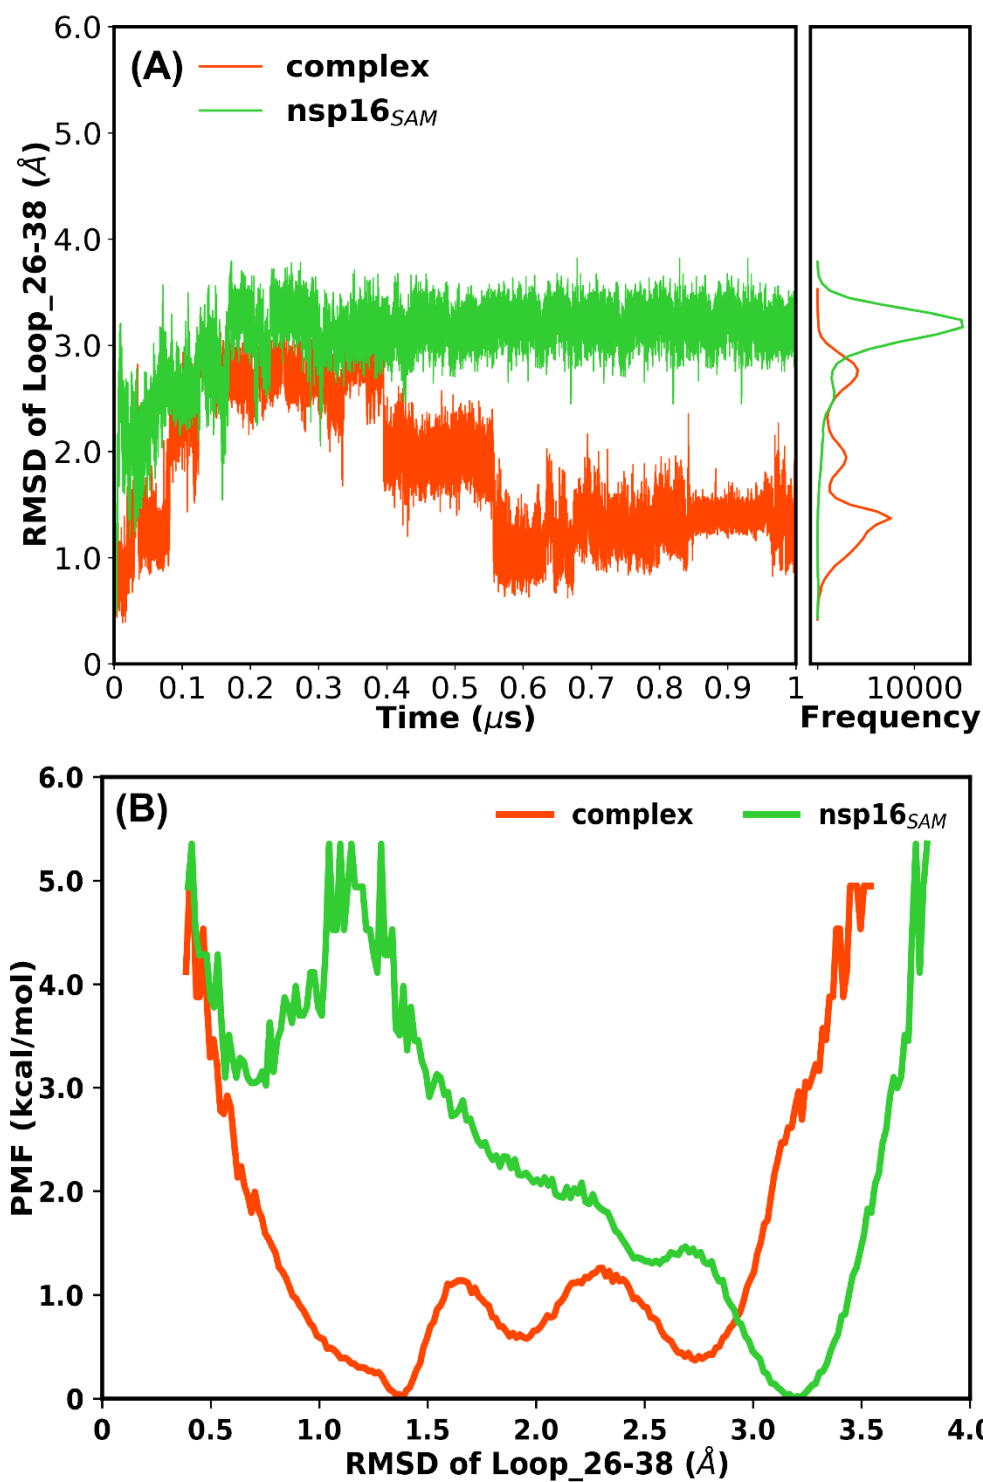

**Figure S3:** (A) The temporal RMSDs of backbone atoms of loop 26-38 in the complex (orange-red) and nsp16<sub>SAM</sub> (lime-green) form, (B) the potential of mean force (PMF) of loop 26-38 by calculated the free energy profile along with the backbone atoms RMSD values of loop 26-38.

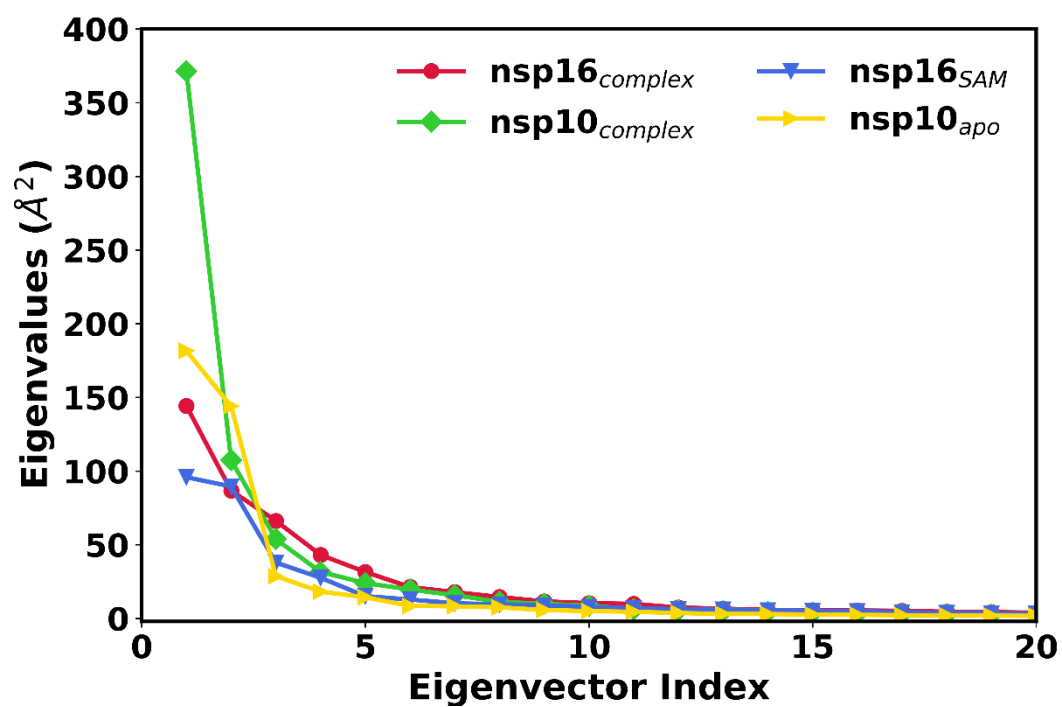

**Figure S4:** Comparison of the eigenvalues plotted against the corresponding eigenvector indices for nsp16<sub>complex</sub> (crimson), nsp10<sub>complex</sub> (lime-green), nsp16<sub>SAM</sub> (sky-blue) and nsp10<sub>apo</sub> (gold).

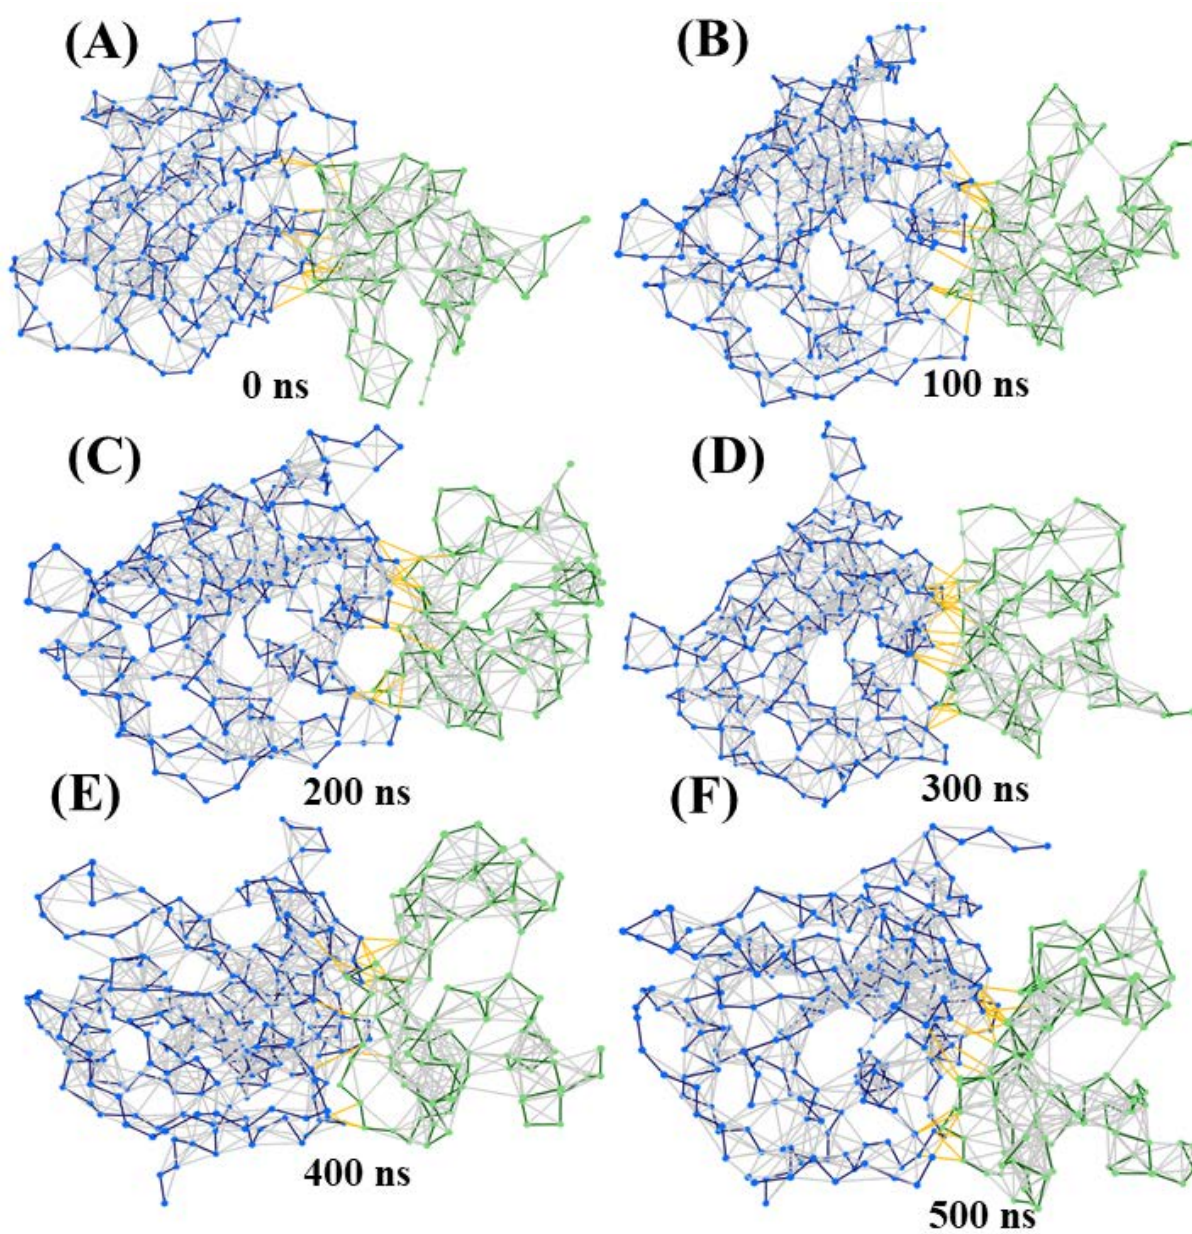

**Figure S5:** The residue contact network analysis between nsp16 and nsp10 in a complex during the simulation. The total number of interaction networks are conserved for each case. The yellow line edges represent contact between nsp16 (blue) and nsp10 (green).

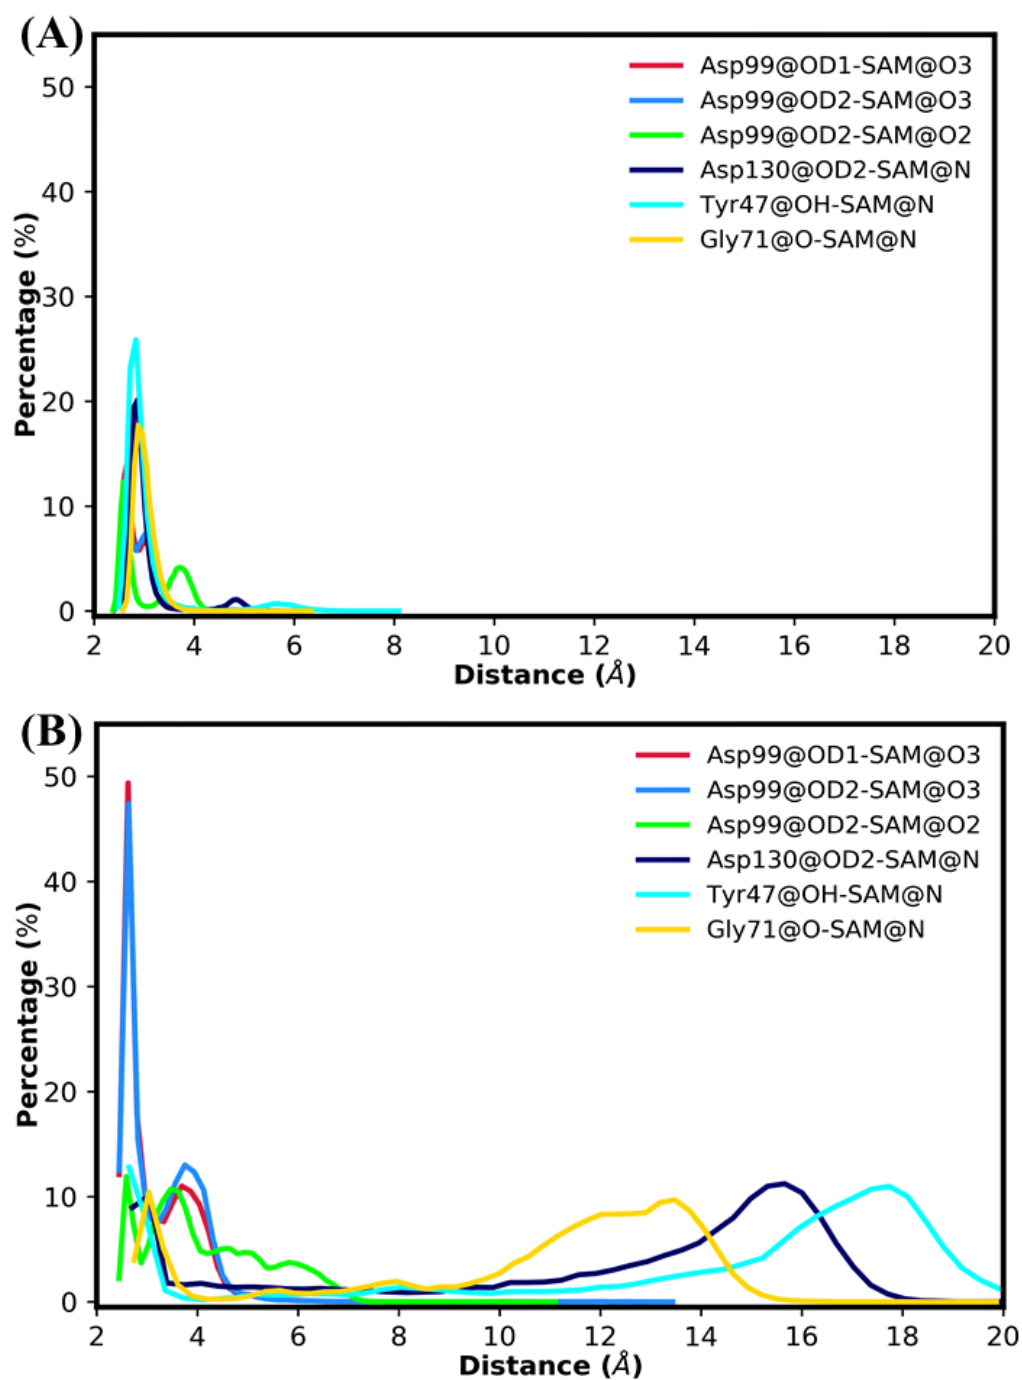

**Figure S6:** The probability distributions of the hydrogen bonds, (A) complex, and (B) monomer nsp16<sub>SAM</sub>.

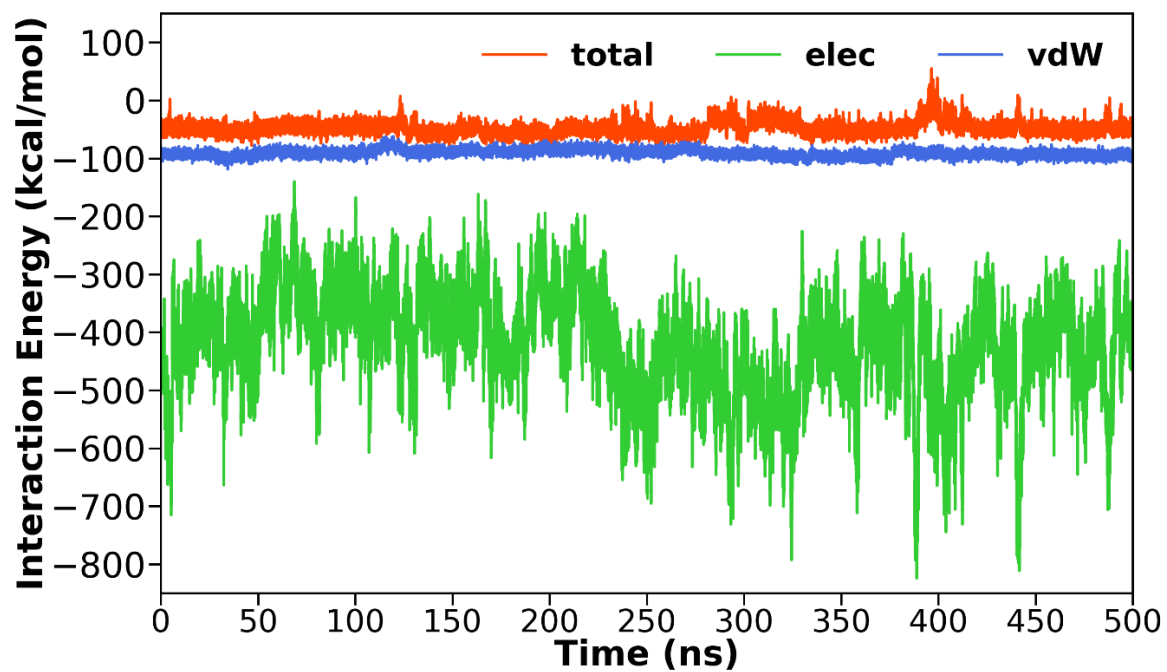

**Figure S7:** The time evolution of total binding free energy, electrostatic energy, and van der Waals energy in the complex nsp16/nsp10 interaction.

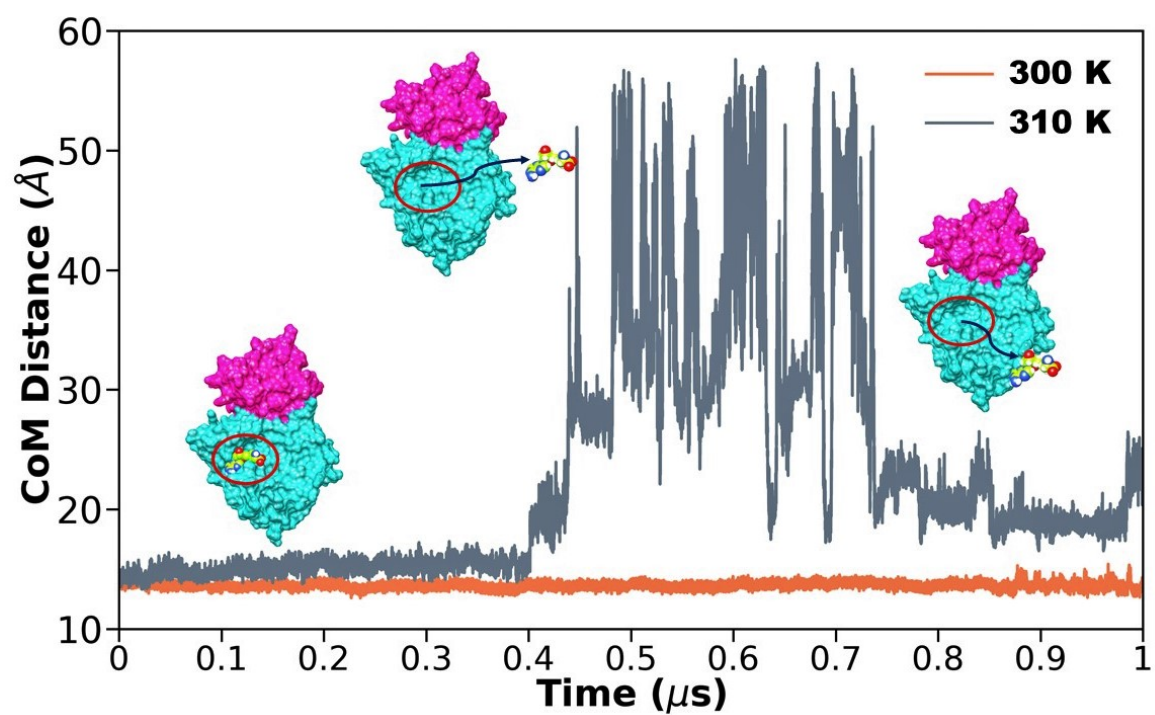

**Figure S8:** The time evolution of the center of mass (CoM) distance between nsp16 and cofactor SAM at two different temperatures 300 K and 310 K.

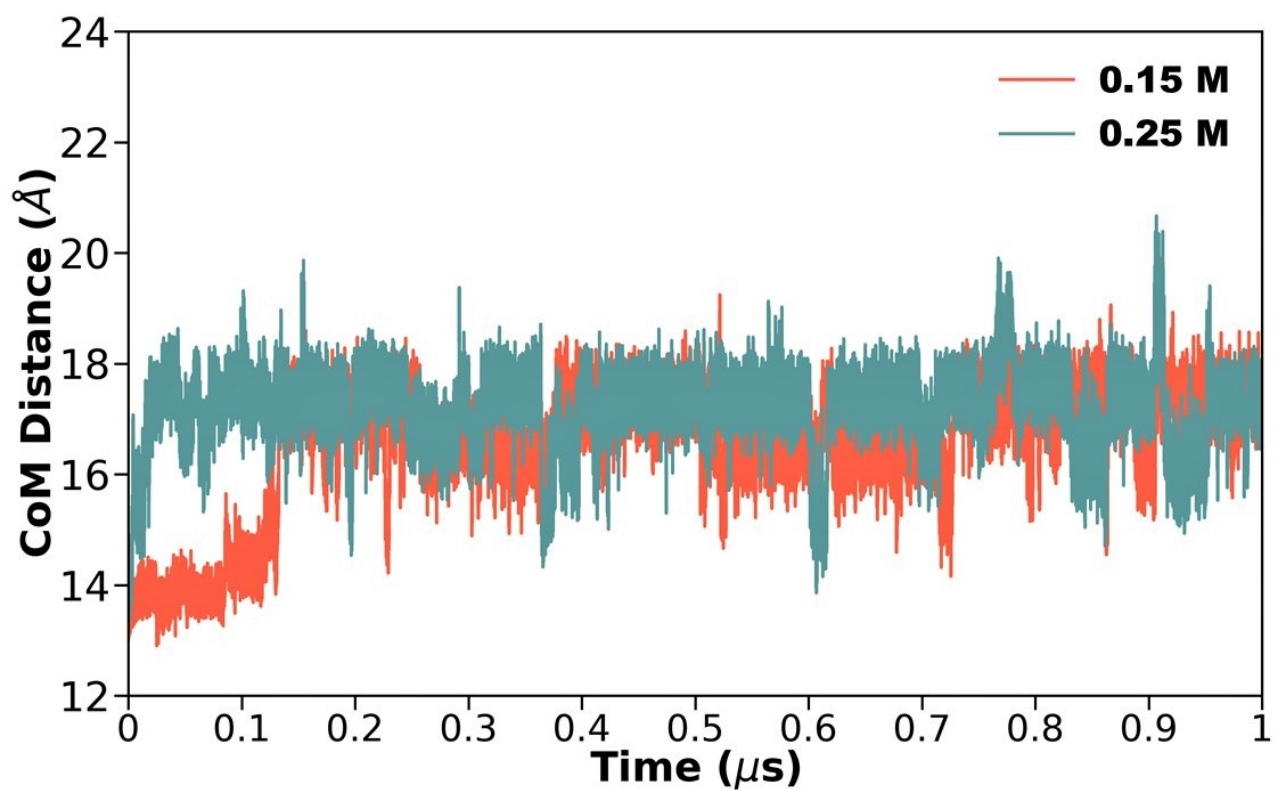

**Figure S9:** The time evolution of the center of mass (CoM) distance between nsp16 and cofactor SAM at two different salt concentrations, 0.15 M and 0.25 M, respectively.
